# Supplementary material for: Chlamydia trachomatis Infection Is Associated with E-Cadherin Promoter Methylation, Downregulation of E-Cadherin Expression, and Increased Expression of Fibronectin and α-SMA—Implications for Epithelial-Mesenchymal Transition
Source: PubMed Central journal article supplement (PMC5469886; doi:10.3389/fcimb.2017.00253), 2017-06-14
Supplement: Table1.pdf [file Table1.pdf]

Table S1

Primer sequences used for qRT-PCR

| <b>Gene name</b> | <b>Forward primer (5'-3')</b> | <b>Reverse primer (5'-3')</b> | <b>Length of PCR product</b> |
|------------------|-------------------------------|-------------------------------|------------------------------|
| <i>TGFβ1</i>     | TACTACGCCAAGGAGGTCAC          | CACGTGCTGCTCCACTTTTA          | 198 bp                       |
| <i>TGFβ2</i>     | CAAGAGCAGAAGGCGAATGG          | TAGCAGGAGATGTGGGGTCT          | 275 bp                       |
| <i>CDH1</i>      | CTTTGACGCCGAGAGCTACA          | CACACCATCTGTGCCCACTT          | 154 bp                       |
| <i>FNI</i>       | GCTGGGCGAGGGAGAATAA           | ACCACATAGGAAGTCCCAGC          | 209 bp                       |
| <i>ACTA2</i>     | CTACGTGGGTGACGAAGCA           | TGCTCTTCAGGGGCAACAC           | 147 bp                       |
| <i>SNAIL</i>     | CAAGGATCTCCAGGCTCGAA          | TGACATCTGAGTGGGTCTGG          | 266 bp                       |
| <i>ZEB2</i>      | AAGTACCAGCGGAAACAAGGA         | AGTGCTCGATAAGGTGGTGC          | 277 bp                       |
| <i>GAPDH</i>     | CGGAGTCAACGGATTTGGTCGTAT      | AGCCTTCTCCATGGTGGTGAAGAC      | 307 bp                       |
