# Supplementary material for: Chlamydia trachomatis Infection Is Associated with E-Cadherin Promoter Methylation, Downregulation of E-Cadherin Expression, and Increased Expression of Fibronectin and α-SMA—Implications for Epithelial-Mesenchymal Transition
Source: PubMed Central journal article supplement (PMC5469886; doi:10.3389/fcimb.2017.00253), 2017-06-14
Supplement: Table3.pdf [file Table3.pdf]

Table S3

Primer sequences used for DNA Methylation Analysis

| <b>Gene name</b> |                          | <b>Forward primer (5'-3')</b>  | <b>Reverse primer (5'-3')</b> | <b>Length of PCR product</b> |
|------------------|--------------------------|--------------------------------|-------------------------------|------------------------------|
| <i>CDHI</i>      | methylated primers (M)   | GTAATTTTAGGTTAGAGGGTTATCGC     | CACAAATACTTTACAATTCCGACG      | 212 bp                       |
| <i>FNI</i>       |                          | AAAACATTAAAAAAAAATTTTCCCG      | TTGGACGGTTAGTAGTAGTAGTTCG     | 143 bp                       |
| <i>ACTA2</i>     |                          | TTTTTAGGTTGCGGGTGTTTAGAAC      | TATCAAACTTATCCAAAAATCCG       | 239 bp                       |
| <i>CDHI</i>      | unmethylated primers (U) | ATTTTAGGTTAGAGGGTTATTGTGT      | ACAAATACTTTACAATTCCAACACC     | 208 bp                       |
| <i>FNI U</i>     |                          | AACATTAAAAAAAAATTTTCCACA       | TTGGATGGTTAGTAGTAGTAGTGTTGG   | 141 bp                       |
| <i>ACTA2</i>     |                          | TTTTTAGGTTTGGGTGTTTAGAATG      | TCAAACTTATCCAAAAATTCCACT      | 237 bp                       |
| <i>ACTA2</i>     | reference primers        | TTTGAGAATTGTTAGAAAATGAGTAATATT | AACTCCTAAACAAACCCTAACAAAC     | 139 bp                       |
